# Supplementary material
Source: Elsevier journal article supplement (https://www.sciencedirect.com/science/article/pii/S0025775320308745)
Supplement: mmc1 [file S0025775320308745:mmc1.doc]

- Para determinar la aparición de los eventos se utilizaron tres fuentes, contrastando siempre la respuesta entre ellas.
  - **Registro de las defunciones y sus causas:** Se firmó un convenio de colaboración con el Instituto Nacional de Estadística para tener acceso a los fallecimientos y su causa fundamental de todos los participantes. Tras el envío de los datos de filiación de la cohorte que nos solicitaron y el pago de las tasas correspondientes se obtuvo dicha información con la fecha del fallecimiento y los códigos CIE-10. Todos los casos fueron revisados con la información disponible en la HCD, tanto hospitalaria como de AP.
  - **Registro de enfermedades cardiovasculares de la base de datos asistencial del Sistema Extremeño de Salud (SES):** Se realizó una búsqueda de casos desde los Sistemas de Información del servicio de salud, que dispone de un sistema de codificación y una historia clínica digital única de cada ciudadano, de los códigos CIE.9 (410-414, 427.5, 430-435, 436.8, 440-445, 785.4), dado que el corte fue hasta 31 de diciembre de 2015, extrayendo la información necesaria para localizar su informe de alta: código, fecha y número del proceso. También se identificaron los participantes que habían tenido sido atendidos en consultas externas de las especialidades de cardiología, neurología y medicina interna, para localizar la posible existencia de casos atendidos en estas y no hubieran sido codificados, por no haber ingresado en la red de hospitales públicos de Extremadura.
  - **Encuesta de salud cardiovascular:** Se elaboró una encuesta de salud cardiovascular estandarizada que constaba de preguntas sobre si habían sido diagnosticados de angina de pecho, infarto de miocardio, ictus o arteriopatia periférica de miembros inferiores. Si la respuesta era positiva para cualquiera de ellas se les preguntaba sin habían motivado ingreso hospitalario y si era así, donde y cuando. A todos los que contestaron afirmativamente se les reviso su HCD de forma completa para confirmar tal suceso o se les solicitó informe si había sido atendido fuera de la comunidad.
- Definición de los Eventos Cardiovasculares: La definición del evento cardiovascular fue previamente establecida mediante criterios clínicos y pruebas complementarías compatibles, prevaleciendo el diagnóstico de alta hospitalario sobre otros documentos para los casos dudosos. Para la definición de infarto de miocardio se estableció la movilización de troponinas junto a ECG y/o pruebas de imagen compatibles con isquemia aguda. Los casos de ictus se exigieron síntomas neurológicos deficitarios, con una localización topográfica determinada y prueba de neuroimagen compatible. Los casos de ictus minor y transitorios se exigió la objetivación de déficit neurológico focal en régimen de hospitalización y un diagnostico a su alta hospitalaria compatible. Todos los casos cardiacos y neurológicos fueron revisados por un cardiólogo y neurólogo expertos en dichas enfermedades respectivamente. La arteriopatía periférica de miembros inferiores requirió de síntomas de claudicación intermitente, ulcera filiada como de isquémica crónica, cirugía de revascularización o amputación. Este fue el evento menos filiado en los informes de alta hospitalaria y los casos encontrados fueron graves o muy sintomáticos, destacando que en dos casos necesitó de revascularización vascular y otro amputación del miembro. La arteriopatía periférica ha sido especialmente estudiada en nuestra cohorte, primero presentando la prevalencia tanto en su forma asintomática según el ITB como sintomática con el cuestionario de Edimburgo (Rev Esp Cardiol. 2012:65:726–33) y después analizando la capacidad predictiva de enfermedad cardiovascular de presentar un ITB < 0,90, recientemente aceptada para publicación (Aten Primaria. 2020 Jun 3; doi: 10.1016/j.aprim.2020.03.005)
